# Supplementary figures and images for: Hybrid intelligence for environmental pollution: biodegradability assessment of organic compounds through multimodal integration of graph attention networks and QSAR models
Source: Royal Society of Chemistry journal article supplement (doi:10.1039/d4em00594e), 2025-01-01

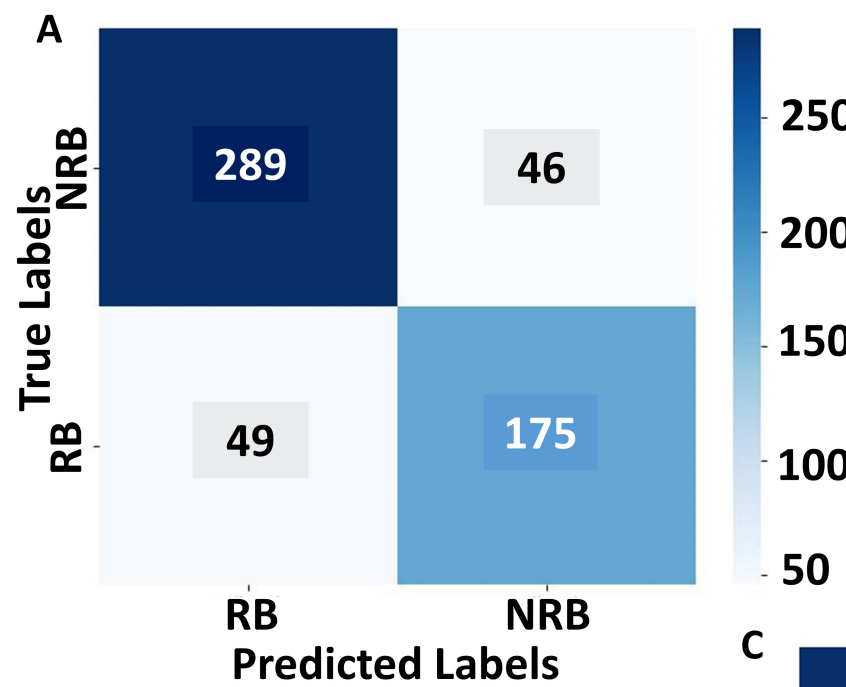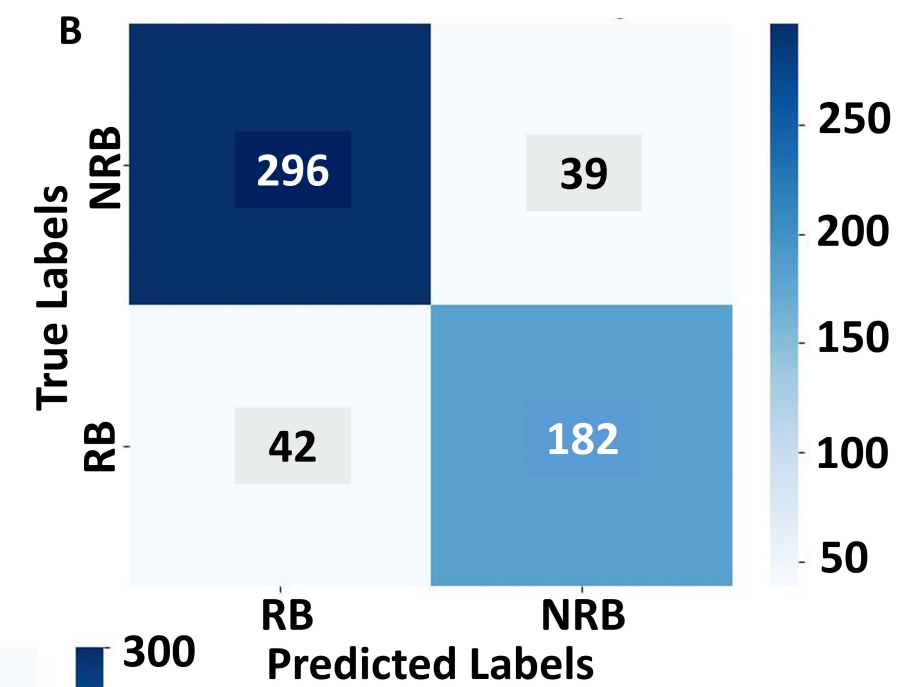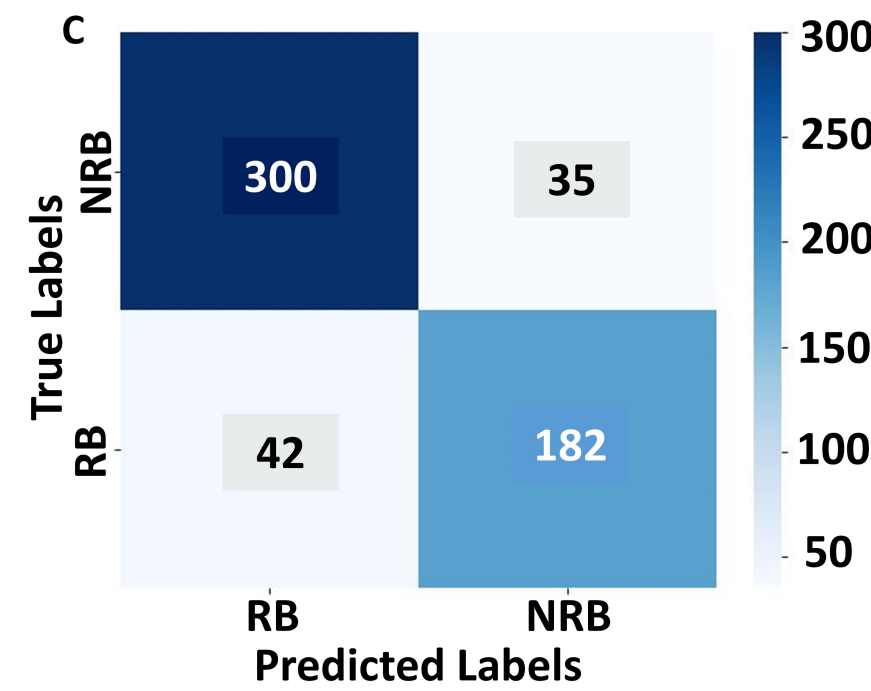

Supplement: d4em00594e2.pdf [file d4em00594e2.pdf]
